# Supplementary material
Source: PubMed Central journal article supplement (PMC6156988)
Supplement: NIHMS1500258-supplement-1.pdf [file NIHMS1500258-supplement-1.pdf]

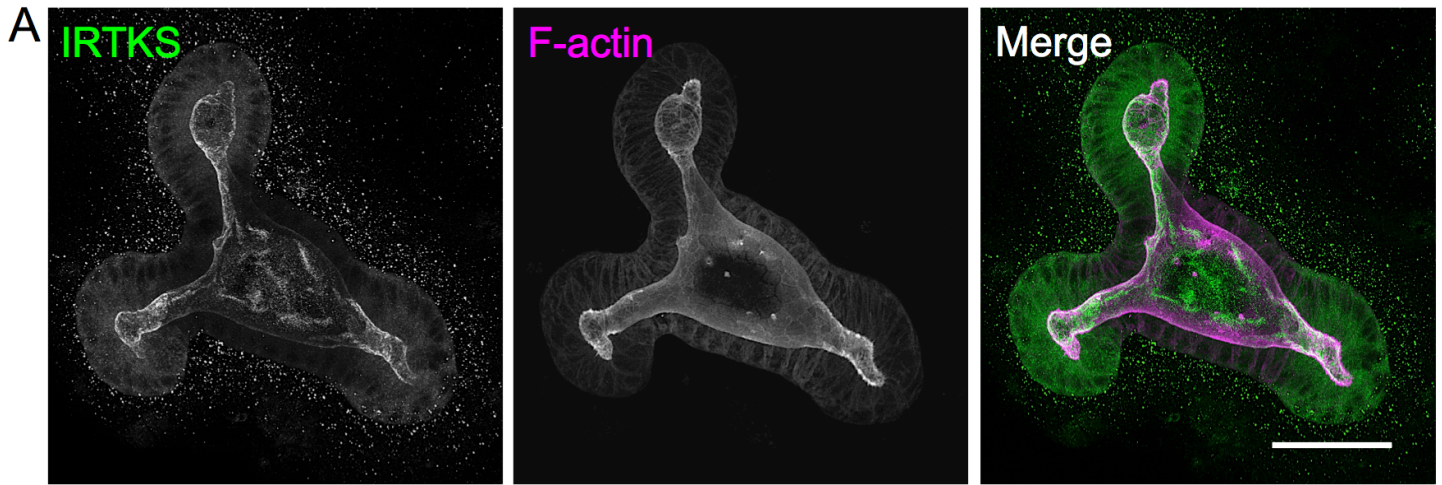

**Figure S1, Related to Figure 1. IRTKS is highly expressed in the intestinal crypt domain.**  
(A) Maximum intensity projection of the IRTKS stained mouse intestinal organoid used in Figure 1B. Scale bar, 40  $\mu\text{m}$ .

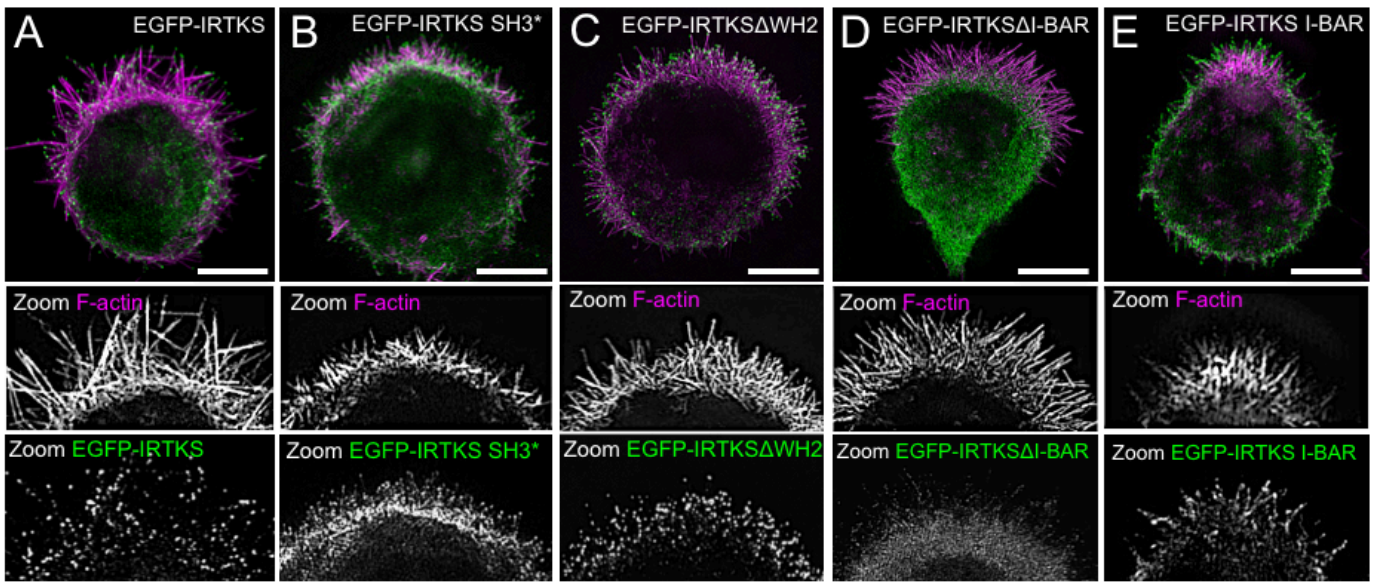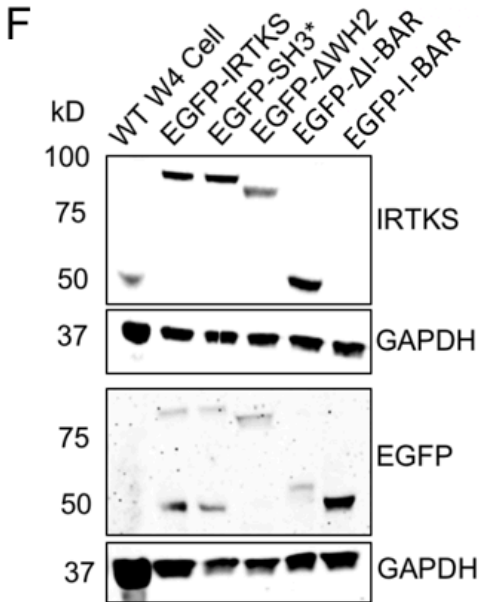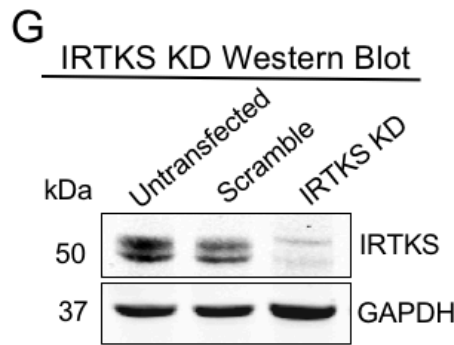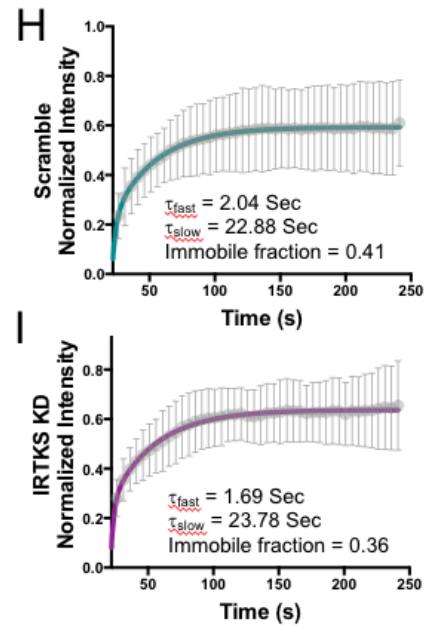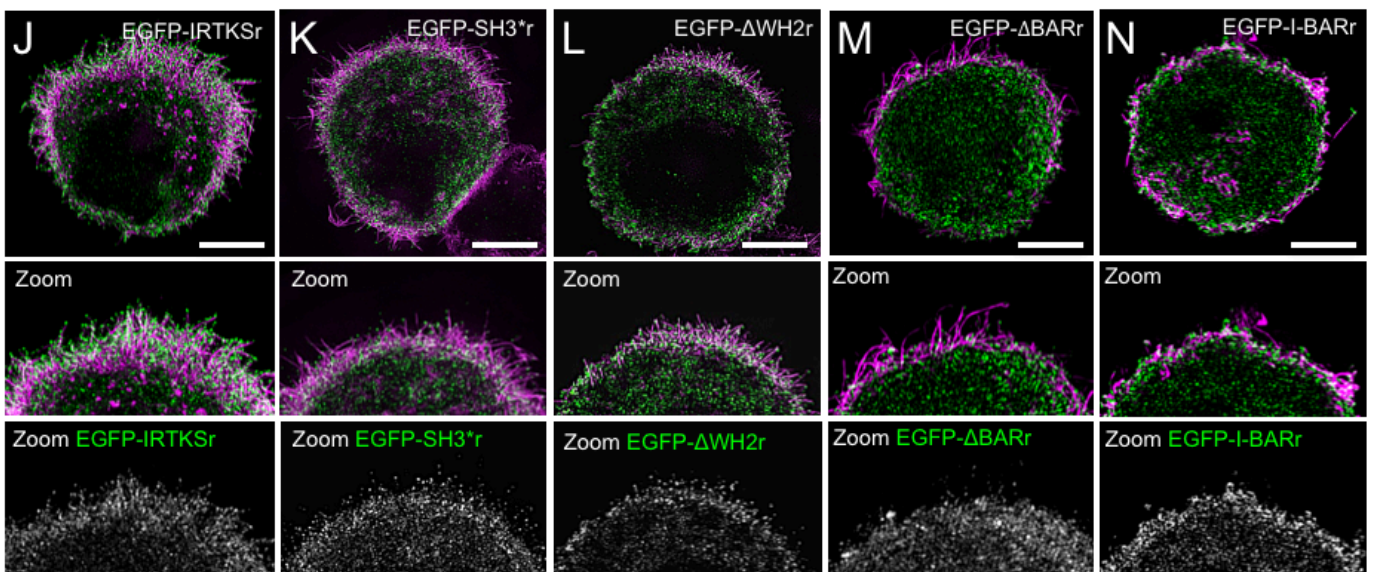

**Figure S2, Related to Figure 3. Split channel images of IRTKS overexpression and KD/rescue cells.** (A-E) SIM projections of Ls174T-W4 cells expressing EGFP-IRTKS constructs (green) and stained with phalloidin (magenta); single channel zooms of the BB are below each image. Scale bars, 5  $\mu\text{m}$ . (F) Western blot analysis of expression levels of EGFP-IRTKS variants in lysates from Ls174T-W4 cells. Both IRTKS and EGFP antibodies were used because the IRTKS antibody is towards a peptide sequence within the SH3 domain, thus the EGFP-I-BAR alone construct will not be targeted. GAPDH was used as a loading control. (G) Western blot analysis of endogenous IRTKS levels in lysates from WT Ls174T-W4 cells (untransfected), shRNA scramble control, and shRNA IRTKS KD. GAPDH was used as a loading control. (H-I) FRAP curves of shRNA scramble control and shRNA IRTKS KD in Ls174T-W4 cells. (J-N) SIM projections of IRTKS KD Ls174T-W4 cells expressing refractory EGFP-IRTKS constructs in rescue experiments. Zooms of the BB and single IRTKS channel below each image. Scale bars, 5  $\mu\text{m}$ .

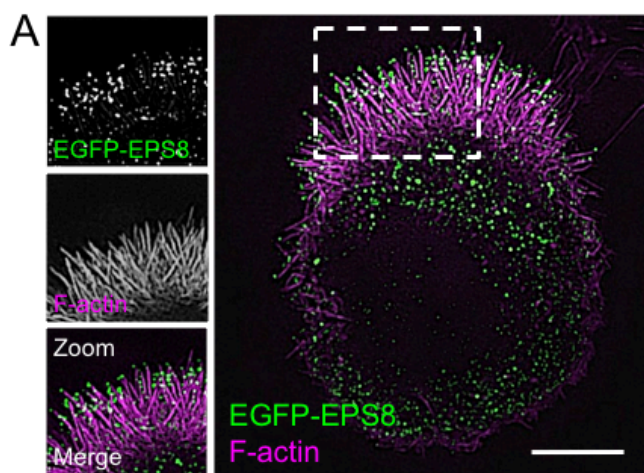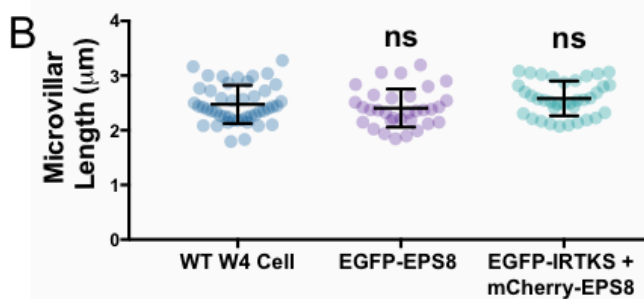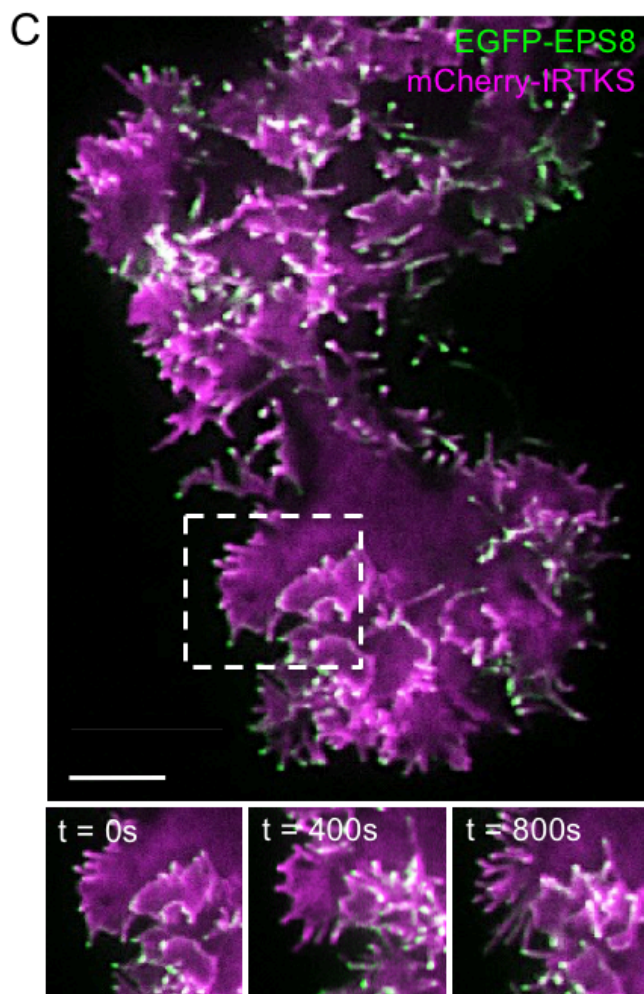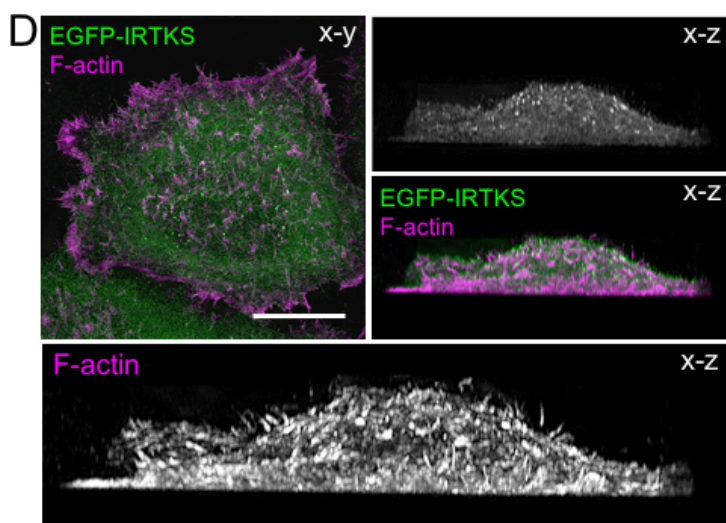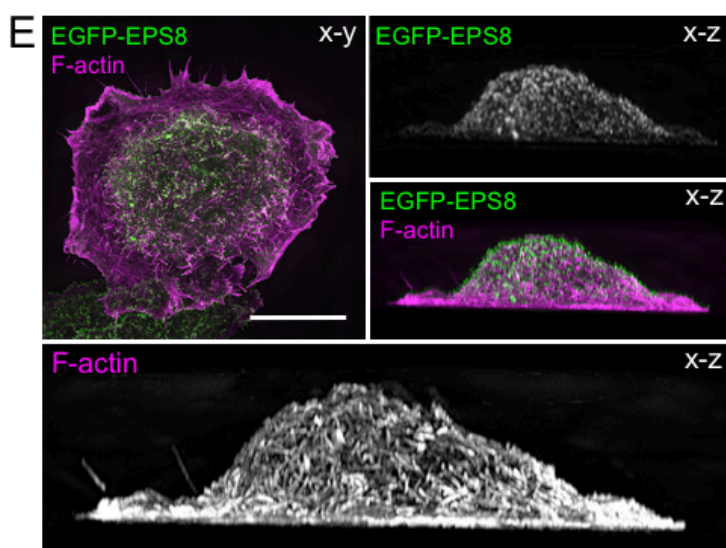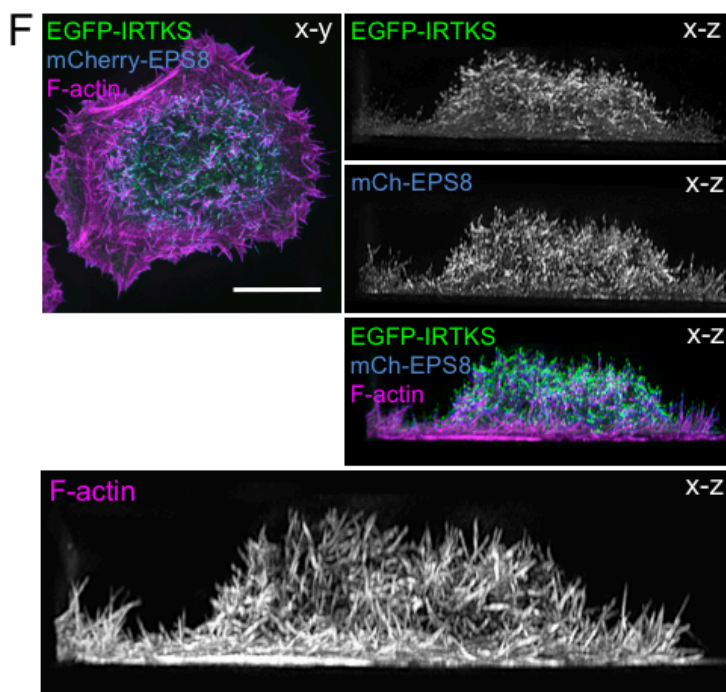

**Figure S3, Related to Figure 4. The impact of EPS8 and IRTKS co-expression on the formation of actin-based protrusions.** (A) SIM projection of a Ls174T-W4 cell expressing EGFP-EPS8. Dashed box indicates zoom; scale bar, 5  $\mu\text{m}$ . (B) Quantitation of microvillar length comparing WT Ls174T-W4 cells, EGFP-EPS8 overexpression and EGFP-IRTKS and mCherry-EPS8 dual overexpression, which do not affect microvillar length. 25 cells/condition, 10 microvilli/cell; student's t test ( $*p < 0.0001$ , ns, not significant) was used to determine the significance. (C) TIRF live-cell imaging of a B16F1 melanoma cell expressing EGFP-EPS8 (green) and mCherry-IRTKS (magenta). Dashed box indicates video frames with time in seconds. Scale bar, 10  $\mu\text{m}$ . (D-F) *En face* (x-y) and lateral (x-z) SIM projections of HeLa cells expressing either EGFP-IRTKS (D), EGFP-EPS8 (E), or EGFP-IRTKS and mCherry-EPS8 (F) and stained with phalloidin. Scale bars, 10  $\mu\text{m}$ .

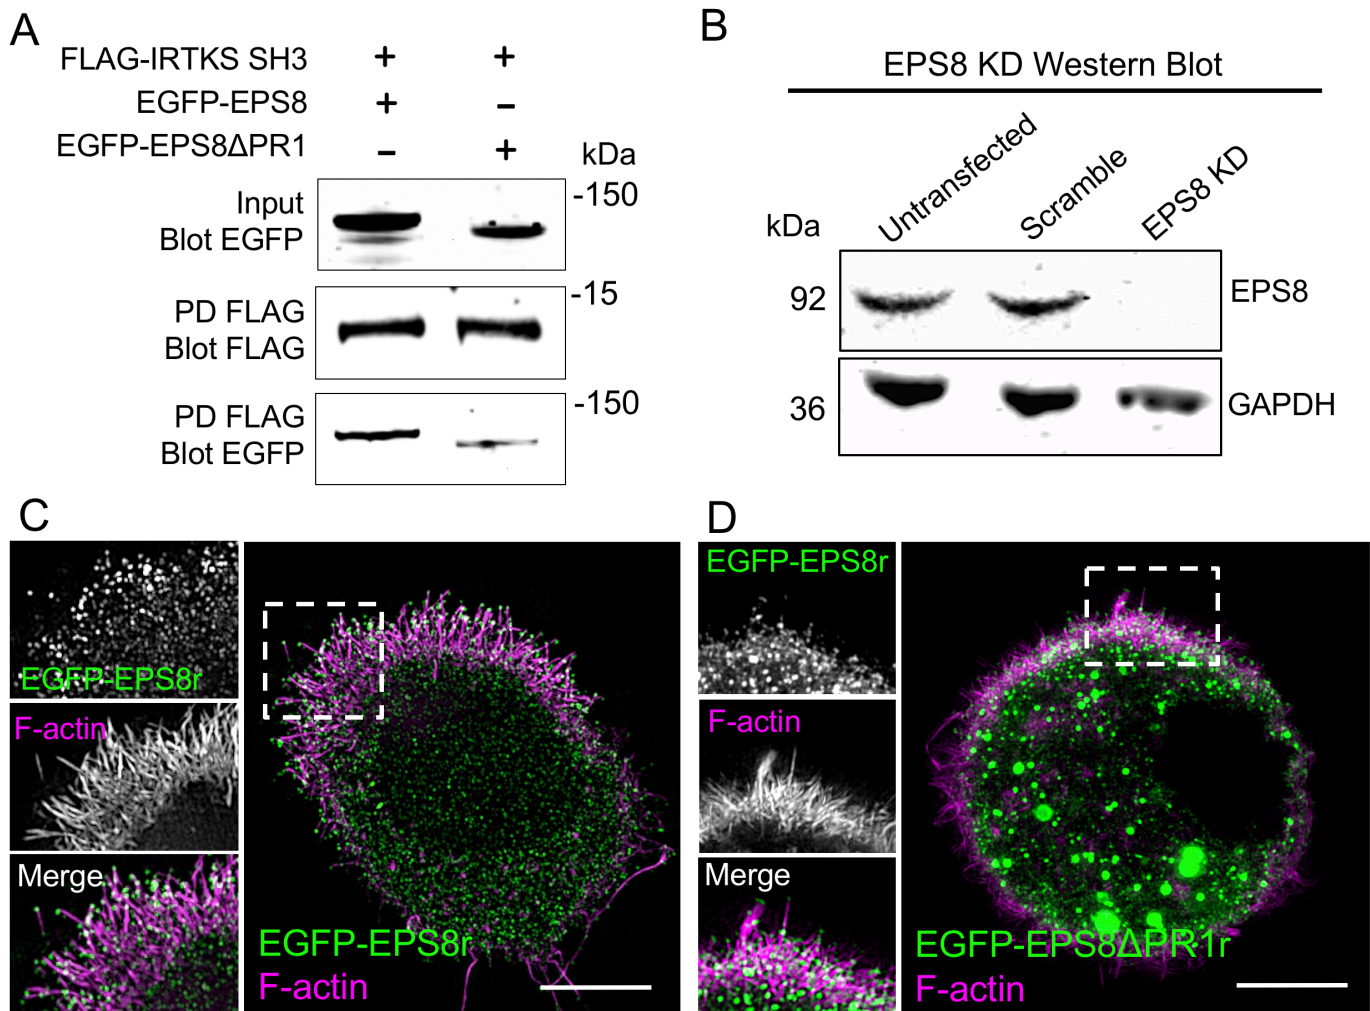

**Figure S4, Related to Figures 5 & 6. Images of EPS8 KD/ rescue Ls174T-W4 cells. (A)** Pulldown of FLAG-tagged IRTKS SH3 domain co-expressed with EGFP-tagged EPS8 or EGFP-tagged EPS8 $\Delta$ PR1 reveals binding between EPS8 and the IRTKS SH3 domain. **(B)** Western blot analysis of endogenous EPS8 levels in lysates from WT Ls174T-W4 cells (untransfected), shRNA scramble control, and shRNA EPS8 KD. GAPDH was used as a loading control. **(C)** SIM projection of an EPS8 KD Ls174T-W4 cell expressing refractory EGFP-EPS8 (EGFP-EPS8r) construct in rescue experiments; dashed box indicates zoom of the BB. Scale bar, 5  $\mu$ m. **(D)** SIM projection of an EPS8 KD Ls174T-W4 cell expressing refractory EGFP-EPS8 $\Delta$ PR1 (EGFP-EPS8 $\Delta$ PR1r) construct in rescue experiments; dashed box indicates zoom of the BB. Scale bar, 5  $\mu$ m.

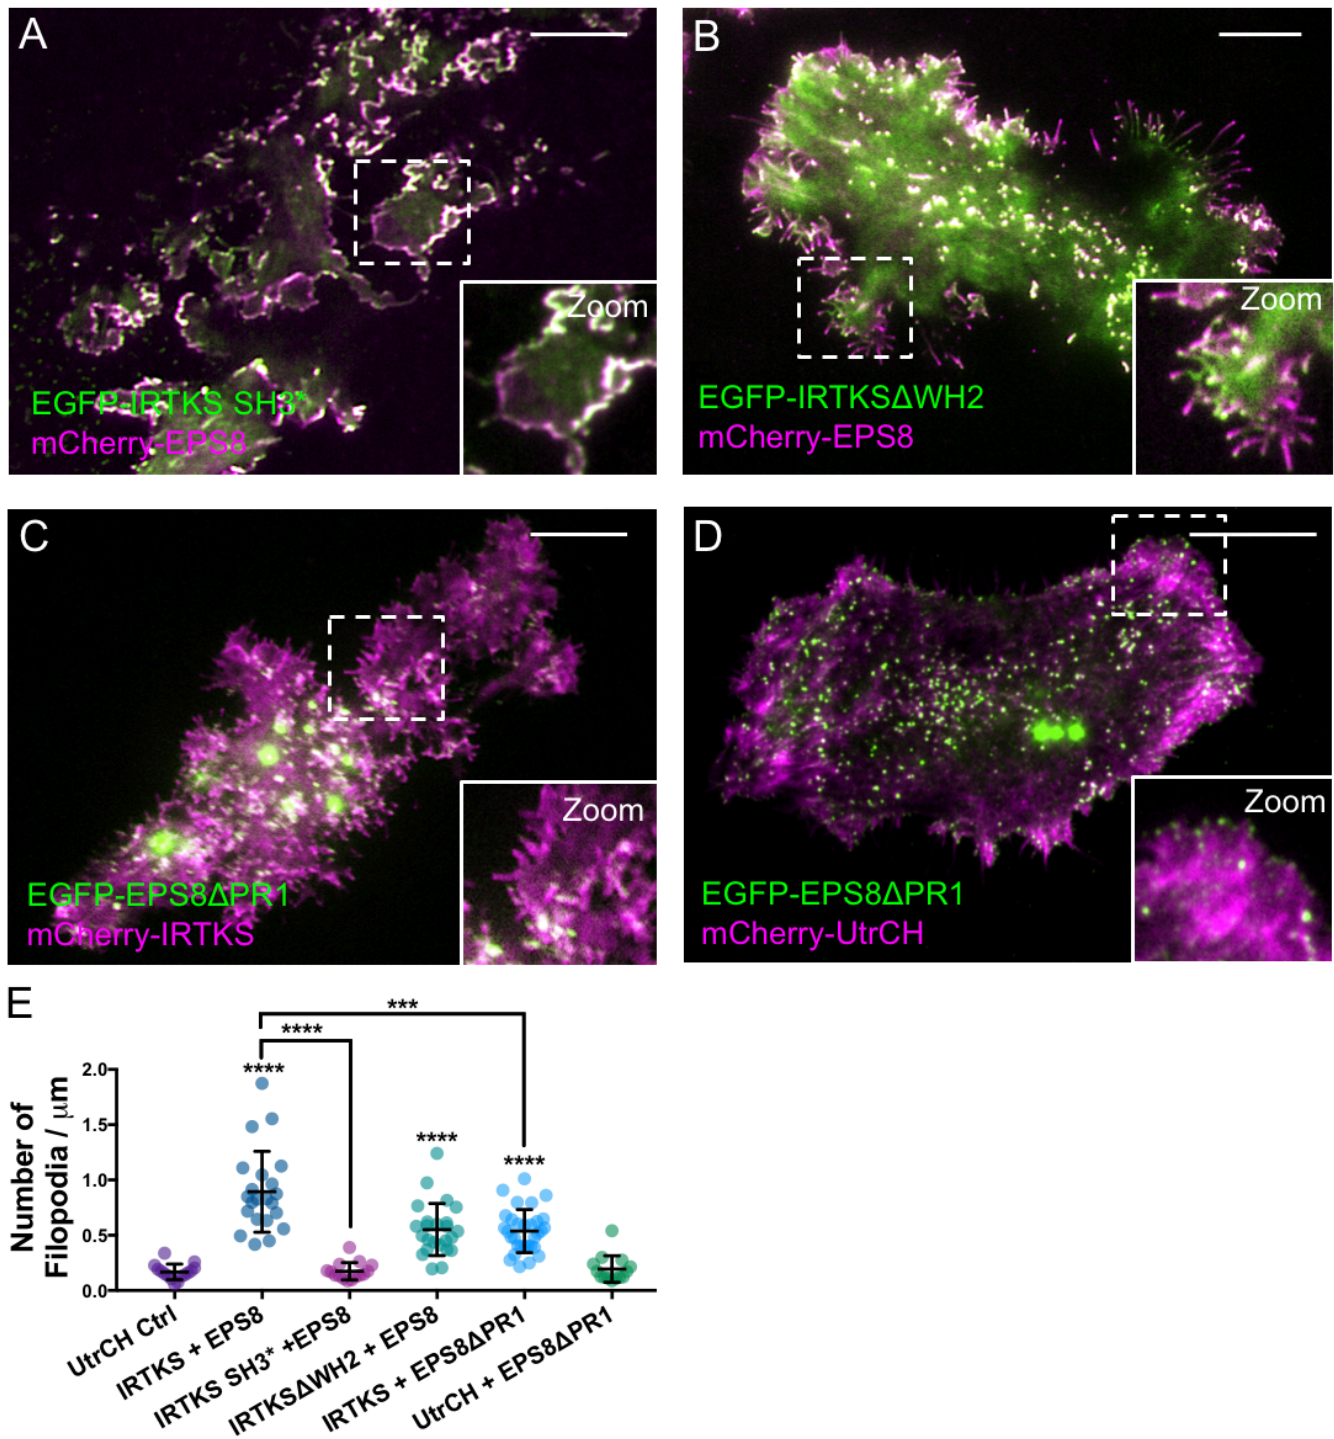

**Figure S5, Related to Figure 6. Additional characterization of the IRTKS/EPS8 complex in B16F1 Melanoma Cells.** (A-D) TIRF live-cell imaging of B16F1 melanoma cells expressing either EGFP-IRTKS SH3\* (green) and mCherry-EPS8 (magenta) (A), EGFP-IRTKS $\Delta$ WH2 (green) and mCherry-EPS8 (magenta) (B), or EGFP-EPS8 $\Delta$ PR1 (green) and mCherry-IRTKS (magenta) (C), and EGFP-EPS8 $\Delta$ PR1 (green) and mCherry-UtrCH (magenta) (D). Dashed boxes indicate zooms. Scale bars, 10  $\mu\text{m}$ . (E) Quantitation of the number of filopodia per  $\mu\text{m}$  of cell perimeter in B16F1 melanoma cells from C-E; at least 15 cells/condition. All error bars indicate mean  $\pm$  SD; all p values calculated using a t test (\*p<0.033, \*\*p<0.002, \*\*\*p<0.0002, \*\*\*\*p<0.0001).
